# Supplementary material for: Invasion origin, rapid population expansion, and the lack of genetic structure of cotton bollworm (Helicoverpa armigera) in the Americas
Source: PubMed Central journal article supplement (PMC6635935; doi:10.1002/ece3.5123), 2019-06-17
Supplement: ECE3-9-7378-s001.pdf [file ECE3-9-7378-s001.pdf]

Product accession numbers of all species obtained in this work

| Region | Location                | Geographic Coordinates (Long/Lat) | ID   | COI - GenBank Accession #† | COII - GenBank Accession #† | Cyt b - GenBank Accession #† | Concatenated Haplotypes | ITS1 (Upper band) - GenBank Accession #† | ITS2 (Lower band)** | rDNA-5S (AL #1, AL #2) | rDNA-18S (AL #1, AL #2) | rDNA-5S (AL #1, AL #2) |  |  |
|--------|-------------------------|-----------------------------------|------|----------------------------|-----------------------------|------------------------------|-------------------------|------------------------------------------|---------------------|------------------------|-------------------------|------------------------|--|--|
| CE/CA  | Cruz das Almas/BA       | 19 01141; -22 46792               | BA1  | KT328705                   | KT328706                    | KF229272                     | BA1                     |                                          |                     |                        |                         |                        |  |  |
| AM     | Barra Garibaldi/RS      | 49 52243; -22 46792               | AM1  | KT328707                   | KT328708                    | KF229273                     | AM1                     |                                          |                     |                        |                         |                        |  |  |
| AT     | Companhia Saneamento/RS | 47 51221; -22 46792               | AT1  | KT328709                   | KT328710                    | KF229274                     | AT1                     |                                          |                     |                        |                         |                        |  |  |
| AM/CE  | Vilhavão/RO             | 40 14551; -12 75254               | AM2  | KT328711                   | KT328712                    | KF229275                     | AM2                     | AM20378                                  |                     |                        |                         |                        |  |  |
| AT     | Ribeirão Preto/SP       | 47 80294; -21 17041               | AT2  | KT328713                   | KT328714                    | KF229276                     | AT2                     |                                          |                     |                        |                         |                        |  |  |
|        |                         |                                   | AT3  | KT328715                   | KT328716                    | KF229277                     | AT3                     |                                          |                     |                        |                         |                        |  |  |
|        |                         |                                   | AT4  | KT328717                   | KT328718                    | KF229278                     | AT4                     |                                          |                     |                        |                         |                        |  |  |
|        |                         |                                   | AT5  | KT328719                   | KT328720                    | KF229279                     | AT5                     |                                          |                     |                        |                         |                        |  |  |
|        |                         |                                   | AT6  | KT328721                   | KT328722                    | KF229280                     | AT6                     |                                          |                     |                        |                         |                        |  |  |
|        |                         |                                   | AT7  | KT328723                   | KT328724                    | KF229281                     | AT7                     |                                          |                     |                        |                         |                        |  |  |
|        |                         |                                   | AT8  | KT328725                   | KT328726                    | KF229282                     | AT8                     |                                          |                     |                        |                         |                        |  |  |
|        |                         |                                   | AT9  | KT328727                   | KT328728                    | KF229283                     | AT9                     |                                          |                     |                        |                         |                        |  |  |
|        |                         |                                   | AT10 | KT328729                   | KT328730                    | KF229284                     | AT10                    |                                          |                     |                        |                         |                        |  |  |
|        |                         |                                   | AT11 | KT328731                   | KT328732                    | KF229285                     | AT11                    |                                          |                     |                        |                         |                        |  |  |
|        |                         |                                   | AT12 | KT328733                   | KT328734                    | KF229286                     | AT12                    |                                          |                     |                        |                         |                        |  |  |
| AT     | Campos de Jaborão/SP    | 48 21668; -23 88561               | AT13 | KT328735                   | KT328736                    | KF229287                     | AT13                    |                                          |                     |                        |                         |                        |  |  |
|        |                         |                                   | AT14 | KT328737                   | KT328738                    | KF229288                     | AT14                    |                                          |                     |                        |                         |                        |  |  |
|        |                         |                                   | AT15 | KT328739                   | KT328740                    | KF229289                     | AT15                    |                                          |                     |                        |                         |                        |  |  |
|        |                         |                                   | AT16 | KT328741                   | KT328742                    | KF229290                     | AT16                    |                                          |                     |                        |                         |                        |  |  |
|        |                         |                                   | AT17 | KT328743                   | KT328744                    | KF229291                     | AT17                    |                                          |                     |                        |                         |                        |  |  |
|        |                         |                                   | AT18 | KT328745                   | KT328746                    | KF229292                     | AT18                    |                                          |                     |                        |                         |                        |  |  |
|        |                         |                                   | AT19 | KT328747                   | KT328748                    | KF229293                     | AT19                    |                                          |                     |                        |                         |                        |  |  |
|        |                         |                                   | AT20 | KT328749                   | KT328750                    | KF229294                     | AT20                    |                                          |                     |                        |                         |                        |  |  |
|        |                         |                                   | AT21 | KT328751                   | KT328752                    | KF229295                     | AT21                    |                                          |                     |                        |                         |                        |  |  |
|        |                         |                                   | AT22 | KT328753                   | KT328754                    | KF229296                     | AT22                    |                                          |                     |                        |                         |                        |  |  |
|        |                         |                                   | AT23 | KT328755                   | KT328756                    | KF229297                     | AT23                    |                                          |                     |                        |                         |                        |  |  |
|        |                         |                                   | AT24 | KT328757                   | KT328758                    | KF229298                     | AT24                    |                                          |                     |                        |                         |                        |  |  |
|        |                         |                                   | AT25 | KT328759                   | KT328760                    | KF229299                     | AT25                    |                                          |                     |                        |                         |                        |  |  |
| AT     | Pedrinhas Paulista/SP   | 50 97316; -22 81785               | AT26 | KT328761                   | KT328762                    | KF229300                     | AT26                    |                                          |                     |                        |                         |                        |  |  |
|        |                         |                                   | AT27 | KT328763                   | KT328764                    | KF229301                     | AT27                    |                                          |                     |                        |                         |                        |  |  |
|        |                         |                                   | AT28 | KT328765                   | KT328766                    | KF229302                     | AT28                    |                                          |                     |                        |                         |                        |  |  |
|        |                         |                                   | AT29 | KT328767                   | KT328768                    | KF229303                     | AT29                    |                                          |                     |                        |                         |                        |  |  |
|        |                         |                                   | AT30 | KT328769                   | KT328770                    | KF229304                     | AT30                    |                                          |                     |                        |                         |                        |  |  |
|        |                         |                                   | AT31 | KT328771                   | KT328772                    | KF229305                     | AT31                    |                                          |                     |                        |                         |                        |  |  |
|        |                         |                                   | AT32 | KT328773                   | KT328774                    | KF229306                     | AT32                    |                                          |                     |                        |                         |                        |  |  |
|        |                         |                                   | AT33 | KT328775                   | KT328776                    | KF229307                     | AT33                    |                                          |                     |                        |                         |                        |  |  |
|        |                         |                                   | AT34 | KT328777                   | KT328778                    | KF229308                     | AT34                    |                                          |                     |                        |                         |                        |  |  |
|        |                         |                                   | AT35 | KT328779                   | KT328780                    | KF229309                     | AT35                    |                                          |                     |                        |                         |                        |  |  |
| AT     | Cândido Mota/SP         | 50 87820; -22 74720               | AT36 | KT328781                   | KT328782                    | KF229310                     | AT36                    |                                          |                     |                        |                         |                        |  |  |
|        |                         |                                   | AT37 | KT328783                   | KT328784                    | KF229311                     | AT37                    |                                          |                     |                        |                         |                        |  |  |
|        |                         |                                   | AT38 | KT328785                   | KT328786                    | KF229312                     | AT38                    |                                          |                     |                        |                         |                        |  |  |
|        |                         |                                   | AT39 | KT328787                   | KT328788                    | KF229313                     | AT39                    |                                          |                     |                        |                         |                        |  |  |
|        |                         |                                   | AT40 | KT328789                   | KT328790                    | KF229314                     | AT40                    |                                          |                     |                        |                         |                        |  |  |
|        |                         |                                   | AT41 | KT328791                   | KT328792                    | KF229315                     | AT41                    |                                          |                     |                        |                         |                        |  |  |
|        |                         |                                   | AT42 | KT328793                   | KT328794                    | KF229316                     | AT42                    |                                          |                     |                        |                         |                        |  |  |
|        |                         |                                   | AT43 | KT328795                   | KT328796                    | KF229317                     | AT43                    |                                          |                     |                        |                         |                        |  |  |
|        |                         |                                   | AT44 | KT328797                   | KT328798                    | KF229318                     | AT44                    |                                          |                     |                        |                         |                        |  |  |
|        |                         |                                   | AT45 | KT328799                   | KT328800                    | KF229319                     | AT45                    |                                          |                     |                        |                         |                        |  |  |
| AM/CE  | Vilaçu/RO               | 63 60040; 8 74130                 | AM3  | KT328801                   | KT328802                    | KF229320                     | AM3                     |                                          |                     |                        |                         |                        |  |  |
|        |                         |                                   | AM4  | KT328803                   | KT328804                    | KF229321                     | AM4                     |                                          |                     |                        |                         |                        |  |  |
|        |                         |                                   | AM5  | KT328805                   | KT328806                    | KF229322                     | AM5                     |                                          |                     |                        |                         |                        |  |  |
|        |                         |                                   | AM6  | KT328807                   | KT328808                    | KF229323                     | AM6                     |                                          |                     |                        |                         |                        |  |  |
|        |                         |                                   | AM7  | KT328809                   | KT328810                    | KF229324                     | AM7                     |                                          |                     |                        |                         |                        |  |  |
|        |                         |                                   | AM8  | KT328811                   | KT328812                    | KF229325                     | AM8                     |                                          |                     |                        |                         |                        |  |  |
|        |                         |                                   | AM9  | KT328813                   | KT328814                    | KF229326                     | AM9                     |                                          |                     |                        |                         |                        |  |  |
|        |                         |                                   | AM10 | KT328815                   | KT328816                    | KF229327                     | AM10                    |                                          |                     |                        |                         |                        |  |  |
|        |                         |                                   | AM11 | KT328817                   | KT328818                    | KF229328                     | AM11                    |                                          |                     |                        |                         |                        |  |  |
|        |                         |                                   | AM12 | KT328819                   | KT328820                    | KF229329                     | AM12                    |                                          |                     |                        |                         |                        |  |  |
| AM/CE  | Bertópolis/RO           | 63 02140; -11 70440               | AM13 | KT328821                   | KT328822                    | KF229330                     | AM13                    |                                          |                     |                        |                         |                        |  |  |
|        |                         |                                   | AM14 | KT328823                   | KT328824                    | KF229331                     | AM14                    |                                          |                     |                        |                         |                        |  |  |
|        |                         |                                   | AM15 | KT328825                   | KT328826                    | KF229332                     | AM15                    |                                          |                     |                        |                         |                        |  |  |
|        |                         |                                   | AM16 | KT328827                   | KT328828                    | KF229333                     | AM16                    |                                          |                     |                        |                         |                        |  |  |
|        |                         |                                   | AM17 | KT328829                   | KT328830                    | KF229334                     | AM17                    |                                          |                     |                        |                         |                        |  |  |
|        |                         |                                   | AM18 | KT328831                   | KT328832                    | KF229335                     | AM18                    |                                          |                     |                        |                         |                        |  |  |
|        |                         |                                   | AM19 | KT328833                   | KT328834                    | KF229336                     | AM19                    |                                          |                     |                        |                         |                        |  |  |
|        |                         |                                   | AM20 | KT328835                   | KT328836                    | KF229337                     | AM20                    |                                          |                     |                        |                         |                        |  |  |
|        |                         |                                   | AM21 | KT328837                   | KT328838                    | KF229338                     | AM21                    |                                          |                     |                        |                         |                        |  |  |
|        |                         |                                   | AM22 | KT328839                   | KT328840                    | KF229339                     | AM22                    |                                          |                     |                        |                         |                        |  |  |
| AM/CE  | Riões de Moura/RO       | 63 77814; -11 70586               | AM23 | KT328841                   | KT328842                    | KF229340                     | AM23                    |                                          |                     |                        |                         |                        |  |  |
|        |                         |                                   | AM24 | KT328843                   | KT328844                    | KF229341                     | AM24                    |                                          |                     |                        |                         |                        |  |  |
|        |                         |                                   | AM25 | KT328845                   | KT328846                    | KF229342                     | AM25                    |                                          |                     |                        |                         |                        |  |  |
|        |                         |                                   | AM26 | KT328847                   | KT328848                    | KF229343                     | AM26                    |                                          |                     |                        |                         |                        |  |  |
|        |                         |                                   | AM27 | KT328849                   | KT328850                    | KF229344                     | AM27                    |                                          |                     |                        |                         |                        |  |  |
|        |                         |                                   | AM28 | KT328851                   | KT328852                    | KF229345                     | AM28                    |                                          |                     |                        |                         |                        |  |  |
|        |                         |                                   | AM29 | KT328853                   | KT328854                    | KF229346                     | AM29                    |                                          |                     |                        |                         |                        |  |  |
|        |                         |                                   | AM30 | KT328855                   | KT328856                    | KF229347                     | AM30                    |                                          |                     |                        |                         |                        |  |  |
|        |                         |                                   | AM31 | KT328857                   | KT328858                    | KF229348                     | AM31                    |                                          |                     |                        |                         |                        |  |  |
|        |                         |                                   | AM32 | KT328859                   | KT328860                    | KF229349                     | AM32                    |                                          |                     |                        |                         |                        |  |  |
| AM/CE  | Araguari/RO             | 63 03344; 9 58610                 | AM33 | KT328861                   | KT328862                    | KF229350                     | AM33                    |                                          |                     |                        |                         |                        |  |  |
|        |                         |                                   | AM34 | KT328863                   | KT328864                    | KF229351                     | AM34                    |                                          |                     |                        |                         |                        |  |  |
|        |                         |                                   | AM35 | KT328865                   | KT328866                    | KF229352                     | AM35                    |                                          |                     |                        |                         |                        |  |  |
|        |                         |                                   | AM36 | KT328867                   | KT328868                    | KF229353                     | AM36                    |                                          |                     |                        |                         |                        |  |  |
|        |                         |                                   | AM37 | KT328869                   | KT328870                    | KF229354                     | AM37                    |                                          |                     |                        |                         |                        |  |  |
|        |                         |                                   | AM38 | KT328871                   | KT328872                    | KF229355                     | AM38                    |                                          |                     |                        |                         |                        |  |  |
|        |                         |                                   | AM39 | KT328873                   | KT328874                    | KF229356                     | AM39                    |                                          |                     |                        |                         |                        |  |  |
|        |                         |                                   | AM40 | KT328875                   | KT328876                    | KF229357                     | AM40                    |                                          |                     |                        |                         |                        |  |  |
|        |                         |                                   | AM41 | KT328877                   | KT328878                    | KF229358                     | AM41                    |                                          |                     |                        |                         |                        |  |  |
|        |                         |                                   | AM42 | KT328879                   | KT328880                    | KF229359                     | AM42                    |                                          |                     |                        |                         |                        |  |  |
| AM/CE  | Teresopolis/RO          | 63 00121; -12 51550               | AM43 | KT328881                   | KT328882                    | KF229360                     | AM43                    |                                          |                     |                        |                         |                        |  |  |
|        |                         |                                   | AM44 | KT328883                   | KT328884                    | KF229361                     | AM44                    |                                          |                     |                        |                         |                        |  |  |
|        |                         |                                   | AM45 | KT328885                   | KT328886                    | KF229362                     | AM45                    |                                          |                     |                        |                         |                        |  |  |
|        |                         |                                   | AM46 | KT328887                   | KT328888                    | KF229363                     | AM46                    |                                          |                     |                        |                         |                        |  |  |
|        |                         |                                   | AM47 | KT328889                   | KT328890                    | KF229364                     | AM47                    |                                          |                     |                        |                         |                        |  |  |
|        |                         |                                   | AM48 | KT328891                   | KT328892                    | KF229365                     | AM48                    |                                          |                     |                        |                         |                        |  |  |
|        |                         |                                   | AM49 | KT328893                   | KT328894                    | KF229366                     | AM49                    |                                          |                     |                        |                         |                        |  |  |
|        |                         |                                   | AM50 | KT328895                   | KT328896                    | KF229367                     | AM50                    |                                          |                     |                        |                         |                        |  |  |
|        |                         |                                   | AM51 | KT328897                   | KT328898                    | KF229368                     | AM51                    |                                          |                     |                        |                         |                        |  |  |
|        |                         |                                   | AM52 | KT328899                   | KT328900                    | KF229369                     | AM52                    |                                          |                     |                        |                         |                        |  |  |
| AM/CE  | Camaçari/BA             | 40 10735; -11 34790               | AM53 | KT328901                   | KT328902                    | KF229370                     | AM53                    |                                          |                     |                        |                         |                        |  |  |
|        |                         |                                   | AM54 | KT328903                   | KT328904                    | KF229371                     | AM54                    |                                          |                     |                        |                         |                        |  |  |
|        |                         |                                   | AM55 | KT328905                   | KT328906                    | KF229372                     | AM55                    |                                          |                     |                        |                         |                        |  |  |
|        |                         |                                   | AM56 | KT328907                   | KT328908                    | KF229373                     | AM56                    |                                          |                     |                        |                         |                        |  |  |
|        |                         |                                   | AM57 | KT328909                   | KT328910                    | KF229374                     | AM57                    |                                          |                     |                        |                         |                        |  |  |
|        |                         |                                   | AM58 | KT328911                   | KT328912                    | KF229375                     | AM58                    |                                          |                     |                        |                         |                        |  |  |
|        |                         |                                   | AM59 | KT328913                   | KT328914                    | KF229376                     | AM59                    |                                          |                     |                        |                         |                        |  |  |
|        |                         |                                   | AM60 | KT328915                   | KT328916                    | KF229377                     | AM60                    |                                          |                     |                        |                         |                        |  |  |
|        |                         |                                   | AM61 | KT328917                   | KT328918                    | KF229378                     | AM61                    |                                          |                     |                        |                         |                        |  |  |
|        |                         |                                   | AM62 | KT328919                   | KT328920                    | KF229379                     | AM62                    |                                          |                     |                        |                         |                        |  |  |
| AM/CE  | Camamu/BA               | 40 10735; -11 34790               | AM63 | KT328921                   | KT328922                    | KF229380                     | AM63                    |                                          |                     |                        |                         |                        |  |  |
|        |                         |                                   | AM64 | KT328923                   | KT328924                    | KF229381                     | AM64                    |                                          |                     |                        |                         |                        |  |  |
|        |                         |                                   | AM65 | KT328925                   | KT328926                    | KF229382                     | AM65                    |                                          |                     |                        |                         |                        |  |  |
|        |                         |                                   | AM66 | KT328927                   | KT328928                    | KF229383                     | AM66                    |                                          |                     |                        |                         |                        |  |  |
|        |                         |                                   | AM67 | KT328929                   | KT328930                    | KF229384                     | AM67                    |                                          |                     |                        |                         |                        |  |  |
|        |                         |                                   | AM68 | KT328931                   | KT328932                    | KF229385                     | AM68                    |                                          |                     |                        |                         |                        |  |  |
|        |                         |                                   | AM69 | KT328933                   | KT328934                    | KF229386                     | AM69                    |                                          |                     |                        |                         |                        |  |  |
|        |                         |                                   | AM70 | KT328935                   | KT328936                    | KF229387                     | AM70                    |                                          |                     |                        |                         |                        |  |  |
|        |                         |                                   | AM71 | KT328937                   | KT328938                    | KF229388                     | AM71                    |                                          |                     |                        |                         |                        |  |  |
|        |                         |                                   | AM72 | KT328939                   | KT328940                    | KF229389                     | AM72                    |                                          |                     |                        |                         |                        |  |  |
| AM/CE  | Canaã/BA                | 40 10735; -11 34790               | AM73 | KT328941                   | KT328942                    | KF229390                     | AM73                    |                                          |                     |                        |                         |                        |  |  |
|        |                         |                                   | AM74 | KT328943                   | KT328944                    | KF229391                     | AM74                    |                                          |                     |                        |                         |                        |  |  |
|        |                         |                                   | AM75 | KT328945                   | KT328946                    | KF229392                     | AM75                    |                                          |                     |                        |                         |                        |  |  |
|        |                         |                                   | AM76 | KT328947                   | KT328948                    | KF229393                     | AM76                    |                                          |                     |                        |                         |                        |  |  |
|        |                         |                                   | AM77 | KT328949                   | KT328950                    | KF229394                     | AM77                    |                                          |                     |                        |                         |                        |  |  |
|        |                         |                                   | AM78 | KT328951                   | KT328952                    | KF229395                     | AM78                    |                                          |                     |                        |                         |                        |  |  |
|        |                         |                                   | AM79 | KT328953                   | KT328954                    | KF229396                     | AM79                    |                                          |                     |                        |                         |                        |  |  |
|        |                         |                                   | AM80 | KT328955                   | KT328956                    | KF229397                     | AM80                    |                                          |                     |                        |                         |                        |  |  |
|        |                         |                                   | AM81 | KT328957                   | KT328958                    | KF229398                     | AM81                    |                                          |                     |                        |                         |                        |  |  |
|        |                         |                                   | AM82 | KT328959                   | KT328960                    | KF229399                     | AM82                    |                                          |                     |                        |                         |                        |  |  |
| AM/CE  | Caratinga/BA            | 40 10735; -11 34790               | AM83 | KT328961                   | KT328962                    | KF229400                     | AM83                    |                                          |                     |                        |                         |                        |  |  |
|        |                         |                                   | AM84 | KT328963                   | KT328964                    | KF229401                     | AM84                    |                                          |                     |                        |                         |                        |  |  |
|        |                         |                                   | AM85 | KT328965                   | KT328966                    | KF229402                     | AM85                    |                                          |                     |                        |                         |                        |  |  |
|        |                         |                                   | AM86 | KT328967                   | KT328968                    | KF229403                     | AM86                    |                                          |                     |                        |                         |                        |  |  |
|        |                         |                                   | AM87 | KT328969                   | KT328970                    | KF229404                     | AM87                    |                                          |                     |                        |                         |                        |  |  |
|        |                         |                                   | AM88 | KT328971                   | KT328972                    | KF229405                     | AM88                    |                                          |                     |                        |                         |                        |  |  |
|        |                         |                                   | AM89 | KT328973                   | KT328974                    | KF229406                     | AM89                    |                                          |                     |                        |                         |                        |  |  |
|        |                         |                                   | AM90 | KT328975                   | KT328976                    | KF229407                     | AM90                    |                                          |                     |                        |                         |                        |  |  |
